## **The relationships between experimental task and questionnaire measures of reward/punishment sensitivity in attention deficit hyperactivity disorder (ADHD): protocol for a scoping review**

Mana Oguchi<sup>1,2</sup>, Emi Furukawa<sup>1</sup>, Naano Nagahama<sup>1,3</sup>, Kokila Dilhani Perera<sup>1</sup>, Gail Tripp<sup>1</sup>

<sup>1</sup> Human Developmental Neurobiology Unit, Okinawa Institute of Science and Technology Graduate University, Okinawa, Japan

<sup>2</sup> Research Fellow of Japan Society for the Promotion of Science, Tokyo, Japan

<sup>3</sup> Laboratory of Behavioral Neuroendocrinology, University of Tsukuba, Ibaraki, Japan

### **Keywords**

Attention deficit hyperactivity disorder, Reinforcement sensitivity, Questionnaire, Experimental task.

### **Abstract**

#### **Introduction**

One of the purported underlying causal mechanisms of attention deficit hyperactivity disorder (ADHD) is altered motivational processes. Questionnaires have been used to identify the characteristics of reward and punishment sensitivity in individuals with ADHD. However, these questionnaires were initially developed to measure individual traits related to anxiety (inhibitory) and impulsivity (approach) tendencies or differences in pleasure-seeking. These reward and punishment sensitivity questionnaires are useful but might not capture all relevant aspects of altered motivational processes in ADHD. The proposed scoping review aims to: 1) examine which aspects of hypothesized altered reward and punishment sensitivity correspond to constructs measured by existing questionnaires, 2) characterize the relationships between ADHD symptomatology and reward and punishment sensitivity as measured by existing questionnaires, and 3) evaluate the consistency between the altered reward and punishment sensitivity as measured by existing questionnaires and experimental task performance.

#### **Methods and analysis**

This scoping review will adhere to the Preferred Reporting Items for Systematic Reviews and Meta-Analyses (PRISMA) Extension for Scoping Reviews and the Joanna Briggs Methodology for Scoping Reviews. Published English language literature will be searched in three electronic databases, with no restriction on the year of publication. Two researchers will independently screen all identified titles/abstracts and review the method sections of the identified papers to confirm their eligibility before

proceeding to full-text review and data extraction. Methods, results, and conclusions will be tabulated by research questions. A narrative review, and summary conclusions will be presented. The evidence will be summarized as descriptive data in the Excel table.

### **Ethics and dissemination**

This study reviews existing publications with ethical approval in place. Therefore, ethical approval is not required. Review results will be disseminated through academic conferences and peer-reviewed manuscripts. Scoping review results will also inform future research to measure and identify altered motivational processes in ADHD.

### **Strengths and limitations of this study**

- This scoping review is the first study to identify which aspects of ADHD reinforcement sensitivity have been measured by existing reward and punishment scales and comprehensively review studies reporting relationships between experimental task results and reward and punishment scales in ADHD. (strengths)
- This study will be conducted according to PRISMA guidelines for systematic reviews. (strength)
- Results will be summarized separately for children/adolescents and adults. (strength)
- This review includes only published peer-reviewed English language studies. (limitation)

## **INTRODUCTION**

### **Review questions**

ADHD is a common neurodevelopmental disorder characterized by three cardinal symptoms: inattention, hyperactivity, and impulsivity [1]. The prevalence of ADHD is approximately 7.6 % in children and 2.6% in adults [2, 3], with some symptom fluctuation across the lifespan [3–5]. Altered motivational processes have been proposed to account for symptoms of ADHD [6–9]. Behavioral studies have identified altered sensitivity to both reward and punishment in individuals with ADHD [10]. Compared to typically developing peers, children with ADHD have been shown to prefer immediate over delayed reward [11–13], to show poorer adaptation to changing reinforcement contingencies [14, 15], and demonstrate faster extinction after learning under partial (discontinuous) reinforcement [16]. There have been fewer studies of sensitivity to punishment in those with ADHD, and the results are mixed. Some studies have shown similar sensitivity to punishment between those with and without ADHD [17, 18], while others report increased sensitivity to punishment amongst those with ADHD [15, 19].

While most of the evidence on altered motivational processing in ADHD comes from experimental studies, questionnaires assessing sensitivity to reward and punishment have also been used. The only questionnaire developed specifically to assess for altered reward sensitivity is the Quick Delay Questionnaire, designed for use with adults, which assesses feelings/attitudes toward waiting and delayed rewards [20]. Individuals with ADHD report higher levels of delay aversion and delay discounting [21], compared to their typically developing peers, which is consistent with the available experimental findings [11, 22].

Other reward and punishment sensitivity questionnaires have been developed for other pathological conditions or are based on reinforcement learning theories. Studies using these questionnaires report inconsistent results in terms of reward and punishment sensitivity in ADHD [23–25]. It is unclear whether they are measuring the same motivational constructs as those evaluated in experimental studies. The most commonly used questionnaires on reward and punishment sensitivity [26] were developed based on Gray's Reinforcement Sensitivity Theory (RST) [27]. This theory conceptualizes reward sensitivity as a biologically based behavioral activation/approach system (BAS), i.e., a temperamental trait to seek rewarding stimuli. Punishment sensitivity is thought to relate to the behavioral inhibition system (BIS), i.e., an anxiety trait to avoid potentially aversive stimuli [28]. An unbalanced BIS/BAS has been linked to

increased risks of psychopathology [29], including ADHD [30, 31]. Quay [32] assumed an underactive BIS leads to an inhibition deficit, poor attention and stimulus seeking in ADHD, while other researchers demonstrated that a high or a dysregulated BAS underlies elevated levels of hyperactive and impulsive behaviors [33–35].

Other questionnaires measure reward anticipation (‘wanting’) and consumption (‘liking’) as expressed in behavior [36] and urges/pleasure seeking [37]. Using a range of questionnaires, excessive, or reduced, reward seeking, anticipation, and consumption have been linked with a range of pathological conditions, including addiction [38, 39], eating disorders [40], and anhedonia [41, 42]. Links between the constructs measured by these questionnaires and ADHD are unclear. Using the UPPS Impulsive Behavior Scale [43, 44] some studies have reported greater urgency to obtain rewards in those with ADHD [45, 46]. Other measures have been developed to examine anhedonia. Many of these measures examine behavior or mood symptoms associated with specific disorders (e.g., depression) or have items that name specific reward stimuli (e.g., social, food) [41, 47–49]. In a study using the Tripartite Pleasure Inventory, Meinzer and colleagues [50] suggested that a reduced capacity to attend to pleasurable stimuli/experiences led to a disorganized pursuit of rewards in those with ADHD.

A smaller number of questionnaires are available to assess sensitivity to punishment in addition to those developed based on, or elaborated from, the RST. Some of these measures attempted to better differentiate responsiveness to punishment and motivation to avoid punishment [51], or removed mention of specific aversive stimuli from questionnaire items (e.g., the Reward and Punishment Responsivity and Motivation Questionnaire) [51]. Using a measure of avoidance of negative outcomes (e.g., Acceptance and Action Questionnaire-□) Bond and colleagues [52] report that individuals with ADHD show increased avoidance of negative thoughts, feelings, and other internal experiences [53]. In children, symptoms of disruptive behavior disorders may imply reduce responsiveness to punishment, i.e., repetitive and persistent patterns of inappropriate behavior despite negative consequences. One questionnaire (Multidimensional Assessment Profile of Disruptive Behavior) [54] explicitly measures insensitivity to punishment. In this questionnaire, temper loss, irritability, and frustration are also conceptualized as overreactions to aversive stimuli/results or non-reward [55]. However, to our knowledge, the association between this questionnaire and ADHD symptoms has not been explored.

Despite the importance of motivational processes in identifying and describing the

characteristics of ADHD, it is unclear whether experimental and questionnaire-based studies evaluate the same aspects of reward and punishment sensitivity or provide consensus. Therefore, this scoping review aims to answer the following questions:

1. Which aspects of hypothesized altered reward and punishment sensitivity in ADHD correspond to the constructs measured by existing questionnaires?
2. What are the relationships between ADHD symptomatology and reward and punishment sensitivity as measured by existing questionnaires?
3. What is the degree of consistency between the experimental and questionnaire findings on reward and punishment sensitivity in ADHD?

By addressing the above questions, this study will identify the overlap and differences in the measurement of reinforcement sensitivity by experimental tasks and questionnaires?

## **METHODS AND ANALYSIS**

This review protocol will follow the Joanna Briggs Institute (JBI) Methodology for Scoping Reviews [56, 57]. Further, this scoping review will be formatted along the PRISMA Extension for Scoping Reviews guidelines (PRISMA-ScR; supplement 1) [58]. The review will run from 17 July (estimated completion date of the search strategy), 2023, through 15 August 2023 (estimated completion date of the review extraction of data).

### **Inclusion criteria**

#### **Participants**

This scoping review will include studies with participants of any age who have a clinical diagnosis of ADHD or elevated ADHD symptoms as reported by parents and teachers in the case of children or adult self-report. Studies that evaluate other neuro-developmental or psychiatric disorders, and do not include ADHD-only groups, will be excluded. Where such studies include ADHD groups, only the results for ADHD will be reported. Studies focused on non-human participants will not be included.

#### **Concept**

This scoping review will focus on the motivational processes in ADHD and will examine

questionnaires that measure reward and punishment sensitivity in ADHD and where applicable their relationship to the results of experimental studies. Specifically, this review will include two types of studies: (1) studies that describe ADHD symptoms/diagnostic status and measure and report reward and punishment sensitivity using questionnaires, and (2) studies that measure and report reward and punishment sensitivity by both questionnaires and experimental tasks. These studies will be organized separately for children/adolescents and adults. The following papers will not be included: case reports, reviews or systematic literature reviews, qualitative studies, opinion pieces, editorials, comments, news, letters to the editor that do not include empirical research, and non-human studies. However, in the Introduction and Discussion sections, the above literature may be reviewed and discussed.

### **Context**

This study's context will be open and will include all published studies (meeting the criteria for the above concept and participants) using questionnaire scales and experimental tasks evaluating reward and punishment sensitivity in ADHD. Furthermore, ADHD in this study includes the presence of an ADHD diagnosis as well as elevated symptoms of ADHD as defined by the reviewed manuscript authors (may include above- and sub-threshold levels of ADHD). Both clinical and community samples, and all geographic regions/settings, races, and genders will be included.

### **Types of evidence**

Any study design that meets inclusion criteria, including self-report data, data obtained from parents, teachers, or researchers, and experimental tasks, will be included in the scope review. There are no restrictions on the year of publication. However, the search will be limited to full-text articles of primary research published in English in peer-reviewed journals. Thus, systematic reviews, meta-analyses, case reports, commentaries, posters, opinion pieces, editorials, comments, newsletters, letters to the editor with no empirical research, non-human studies, and gray literature will be excluded due to resource constraints and to be consistent with the purpose of this study.

### **Search strategy**

This search will be conducted across three databases using the search engine Google: PubMed

(MEDLINE), Web of Science, APA PsycINFO (Ovid). The following search terms and synonyms will be used: population (e.g., attention deficit disorder with hyperactivity [MeSH Terms]), measurements (e.g., surveys and questionnaires [MeSH Terms]), and the concepts of measurement (e.g., reinforcement, psychology [MeSH Terms], reward sensitivity [All Fields], punishment sensitivity [All Fields]). All phrases considered were included in the search string. Using several databases, preliminary searches were carried out to determine keywords, descriptors, and Medical Subject Headings (MeSH). The completed search strategy was built based on those searches, and the determined items were integrated with the Boolean operators AND, OR, and NOT. The draft version of the search strategy for the PubMed, Web of Science, and PsycInfo databases is included in supplementary appendix 2. This search was conducted on 17 July 2023 through those databases and 4,729 papers without duplicates were identified. We will find related measurement reports via different databases or sources (e.g., Google Scholar) and list all articles citing those papers. Searches from citations in papers that met the criteria will be included. The final scoping review will include the detailed search strategies for all sources.

### **Study selection**

To validate the inclusion/exclusion criteria, preliminary searches were conducted on several databases. Based on the preliminary search, this review will be implemented using an integrated research strategy with Boolean operators AND and OR. The final search will take place between July to August, and hand searching will continue throughout in abstract review period. All studies identified by the database and hand search will be grouped and duplicates removed using Covidence software [59]. The software is a web platform tool with functions for systematic reviews, including importing and screening literature and assessing the risk of bias. Using this software, two independent researchers (MO and NN) will screen to verify the presence or absence of study eligibility criteria, participants, concept, and context. The researchers will first screen all identified titles/abstracts (ADHD or related terms and the use of a reward and punishment sensitivity questionnaire or experimental task must be mentioned) and the same researchers will then review the method sections of the papers to examine if studies meet the full inclusion criteria. All studies excluded during the screening phase and the reasons for exclusion will be reported. Any conflicts in both phases of screening (abstract and full-text screening) will be resolved through discussion between the two researchers and consultation with the research team (protocol authors).

### **Data extraction**

The data included in the final paper of this scoping review will be extracted by two independent researchers (MO, NN) using a data extraction form developed based on the JBI template [60]. The template for data extraction may be further refined and updated throughout the review phase. Individual research methods, participants, measurements, results, and conclusions will be summarized in a table using an Excel file. If necessary, the authors of the published papers will be contacted to request missing or additional data. The study description and research questions will be retained as information of interest for this review (Supplementary appendix 3).

### **Presentation of results**

All information regarding the selection of papers is presented in a flow figure according to PRISMA-ScR (Supplementary appendix 1). The results of all studies that meet the criteria will be summarized in tables with descriptive data and in narrative form. In addition, the tables of results will include correlation coefficients between experimental tasks and questionnaires where these are available. Evidence will be summarized as the number of papers and categorized by article type and study design type to highlight areas where additional research may be needed to fill current evidence gaps. This scoping review will identify gaps in what has been measured in terms of reward and punishment sensitivity in ADHD using existing questionnaires. The results will be reported separately for childhood/adolescents (under the age of 18) and adults (over 18) [61].

Implications for future research will be discussed based on the relationship between the findings from questionnaire research and hypothesized altered motivational processing as well as experimental research results. There will also be a discussion of the need and feasibility of future research on questionnaires in the context of ADHD motivational processing and a systematic review/meta-analysis of response differences in questionnaires by ADHD symptom status/severity.

### **Participants and public involvement**

The protocol and scoping review will not include members of the general public or patients.



## **ETHICS AND DISSEMINATION**

Since this proposed study is a scoping review, there are no required ethical or safety considerations. The results of the scoping review will be disseminated through publication in peer-reviewed journals and conference presentations.

### **Acknowledgments**

Nothing.

### **Contributors**

MO, EF, and GT contributed to the conception and design of this protocol. MO and NN led the search strategy and pilot data mapping, supported by EF, KD, and GT. MO drafted the manuscript and EF and GT contributed to the revisions. KD assessed this protocol along with the PRISMA-ScR checklist, which was reviewed by all authors. All authors (MO, EF, NN, KD, GT) approved the final version of the manuscript for accuracy, completeness, and publication.

### **Funding**

This study is supported by the Japan Society Promotion of Science (JSPS) KAKENHI, grant number 23KJ2130, and the internal subsidy funding from the OIST Graduate University, Japan.

### **Competing interests**

None declared.

### **Patient consent for publication**

Not required.

### **Provenance and peer review**

Not commissioned: externally peer-reviewed.

### **Open access**

Yes.

### Conflicts of interest

All authors declare no conflicts of interest.

### REFERENCES

- 1 American Psychiatric Association. *Diagnostic and Statistical Manual of Mental Disorders: DSM-5-TR*. American Psychiatric Association Publishing 2022.  
<https://play.google.com/store/books/details?id=PIGizgEACAAJ>
- 2 Salari N, Ghasemi H, Abdoli N, *et al*. The global prevalence of ADHD in children and adolescents: a systematic review and meta-analysis. *Ital J Pediatr* 2023;**49**:48. doi:10.1186/s13052-023-01456-1
- 3 Song P, Zha M, Yang Q, *et al*. The prevalence of adult attention-deficit hyperactivity disorder: A global systematic review and meta-analysis. *J Glob Health* 2021;**11**:04009.  
doi:10.7189/jogh.11.04009
- 4 Karam RG, Rovaris DL, Breda V. Trajectories of attention-deficit/hyperactivity disorder dimensions in adults. *Acta Psychiatrica* Published Online First: 2017.<https://onlinelibrary.wiley.com/doi/abs/10.1111/acps.12757>
- 5 Kirova A-M, Kelberman C, Storch B, *et al*. Are subsyndromal manifestations of attention deficit hyperactivity disorder morbid in children? A systematic qualitative review of the literature with meta-analysis. *Psychiatry Res* 2019;**274**:75–90. doi:10.1016/j.psychres.2019.02.003
- 6 Barkley RA. Behavioral inhibition, sustained attention, and executive functions: constructing a unifying theory of ADHD. *Psychol Bull* 1997;**121**:65–94. doi:10.1037/0033-2909.121.1.65
- 7 Luman M, Tripp G, Scheres A. Identifying the neurobiology of altered reinforcement sensitivity in ADHD: a review and research agenda. *Neurosci Biobehav Rev* 2010;**34**:744–54.  
doi:10.1016/j.neubiorev.2009.11.021
- 8 Sagvolden T, Johansen EB, Aase H, *et al*. A dynamic developmental theory of attention-

- deficit/hyperactivity disorder (ADHD) predominantly hyperactive/impulsive and combined subtypes. *Behav Brain Sci* 2005;**28**:397–419; discussion 419-68. doi:10.1017/S0140525X05000075
- 9 Tripp G, Wickens JR. Research review: dopamine transfer deficit: a neurobiological theory of altered reinforcement mechanisms in ADHD. *J Child Psychol Psychiatry* 2008;**49**:691–704. doi:10.1111/j.1469-7610.2007.01851.x
  - 10 van der Oord S, Tripp G. How to Improve Behavioral Parent and Teacher Training for Children with ADHD: Integrating Empirical Research on Learning and Motivation into Treatment. *Clin Child Fam Psychol Rev* 2020;**23**:577–604. doi:10.1007/s10567-020-00327-z
  - 11 Marx I, Hacker T, Yu X, *et al.* ADHD and the Choice of Small Immediate Over Larger Delayed Rewards: A Comparative Meta-Analysis of Performance on Simple Choice-Delay and Temporal Discounting Paradigms. *J Atten Disord* 2021;**25**:171–87. doi:10.1177/1087054718772138
  - 12 Sonuga-Barke EJS, Sergeant JA, Nigg J, *et al.* Executive dysfunction and delay aversion in attention deficit hyperactivity disorder: nosologic and diagnostic implications. *Child Adolesc Psychiatr Clin N Am* 2008;**17**:367–84, ix. doi:10.1016/j.chc.2007.11.008
  - 13 Tripp G, Alsop B. Sensitivity to reward delay in children with attention deficit hyperactivity disorder (ADHD). *J Child Psychol Psychiatry* 2001;**42**:691–8. doi:10.1111/1469-7610.00764
  - 14 Alsop B, Furukawa E, Sowerby P, *et al.* Behavioral sensitivity to changing reinforcement contingencies in attention-deficit hyperactivity disorder. *J Child Psychol Psychiatry* 2016;**57**:947–56. doi:10.1111/jcpp.12561
  - 15 Furukawa E, Shimabukuro S, Alsop B, *et al.* Behavioral sensitivity of Japanese children with and without ADHD to changing reinforcer availability: an experimental study using signal detection methodology. *Behav Brain Funct* 2017;**13**:13. doi:10.1186/s12993-017-0131-6
  - 16 Hulsbosch A-K, Beckers T, De Meyer H, *et al.* Instrumental learning and behavioral persistence in children with attention-deficit/hyperactivity-disorder: does reinforcement frequency matter? *J Child Psychol Psychiatry* Published Online First: 11 April 2023. doi:10.1111/jcpp.13805

- 17 Carlson CL, Mann M, Alexander DK. Effects of Reward and Response Cost on the Performance and Motivation of Children with ADHD. *Cognit Ther Res* 2000;**24**:87–98. doi:10.1023/A:1005455009154
- 18 Iaboni F, Douglas VI, Baker AG. Effects of reward and response costs on inhibition in ADHD children. *J Abnorm Psychol* 1995;**104**:232–40. doi:10.1037/0021-843X.104.1.232
- 19 Furukawa E, Alsop B, Shimabukuro S, *et al.* Is increased sensitivity to punishment a common characteristic of attention deficit/hyperactivity disorder? An experimental study of response allocation in Japanese children. *ADHD Attention Deficit and Hyperactivity Disorders* 2019;**11**:433–43. doi:10.1007/s12402-019-00307-6
- 20 Clare S, Helps S, Sonuga-Barke EJS. The quick delay questionnaire: a measure of delay aversion and discounting in adults. *Atten Defic Hyperact Disord* 2010;**2**:43–8. doi:10.1007/s12402-010-0020-4
- 21 Thorell LB, Sjöwall D, Mies GW, *et al.* Quick Delay Questionnaire: Reliability, validity, and relations to functional impairments in adults with attention-deficit/hyperactivity disorder (ADHD). *Psychol Assess* 2017;**29**:1261–72. doi:10.1037/pas0000421
- 22 Jackson JNS, MacKillop J. Attention-Deficit/Hyperactivity Disorder and Monetary Delay Discounting: A Meta-Analysis of Case-Control Studies. *Biol Psychiatry Cogn Neurosci Neuroimaging* 2016;**1**:316–25. doi:10.1016/j.bpsc.2016.01.007
- 23 Liu T-L, Su C-H, Lee J-I, *et al.* The reinforcement sensitivity of male adults with attention-deficit/hyperactivity disorder: The association with internet addiction. *Taiwanese Journal of Psychiatry* 2019;**33**:39. doi:10.4103/TPSY.TPSY\_7\_19
- 24 Pironti VA, Lai M-C, Müller U, *et al.* Personality traits in adults with attention-deficit hyperactivity disorder and their unaffected first-degree relatives. *BJPsych Open* 2016;**2**:280–5. doi:10.1192/bjpo.bp.116.003608
- 25 Todokoro A, Tanaka SC, Kawakubo Y, *et al.* Deficient neural activity subserving decision-making during reward waiting time in intertemporal choice in adult attention-deficit hyperactivity disorder. *Psychiatry Clin Neurosci* 2018;**72**:580–90. doi:10.1111/pcn.12668

- 26 Torrubia R, Ávila C, Moltó J, *et al.* The Sensitivity to Punishment and Sensitivity to Reward Questionnaire (SPSRQ) as a measure of Gray's anxiety and impulsivity dimensions. *Pers Individ Dif* 2001;**31**:837–62. doi:10.1016/S0191-8869(00)00183-5
- 27 Gray Neil JA. *The neuropsychology of anxiety: An enquiry into the functions of the septo-hippocampal system*. Clarendon Press/Oxford University Press. 1982.
- 28 Gray JA. The psychophysiological basis of introversion-extraversion. *Behav Res Ther* 1970;**8**:249–66. doi:10.1016/0005-7967(70)90069-0
- 29 Bijttebier P, Beck I, Claes L, *et al.* Gray's Reinforcement Sensitivity Theory as a framework for research on personality-psychopathology associations. *Clin Psychol Rev* 2009;**29**:421–30. doi:10.1016/j.cpr.2009.04.002
- 30 Luman M, van Meel CS, Oosterlaan J, *et al.* Reward and punishment sensitivity in children with ADHD: validating the Sensitivity to Punishment and Sensitivity to Reward Questionnaire for children (SPSRQ-C). *J Abnorm Child Psychol* 2012;**40**:145–57. doi:10.1007/s10802-011-9547-x
- 31 Quay HC. The behavioral reward and inhibition system in childhood behavior disorder. In: Bloomingdale LM, ed. *Attention deficit disorder, Vol.* 1988. 176–86. <https://psycnet.apa.org/fulltext/1988-98066-012.pdf>
- 32 Quay HC. Inhibition and attention deficit hyperactivity disorder. *J Abnorm Child Psychol* 1997;**25**:7–13. doi:10.1023/a:1025799122529
- 33 Mitchell JT, Robertson CD, Kimbrel NA, *et al.* An evaluation of behavioral approach in adults with ADHD. *J Psychopathol Behav Assess* 2011;**33**:430–7. doi:10.1007/s10862-011-9253-6
- 34 Mitchell JT, Nelson-Gray RO. Attention-Deficit/Hyperactivity Disorder symptoms in adults: Relationship to Gray's Behavioral Approach System. *Pers Individ Dif* 2006;**40**:749–60. doi:10.1016/j.paid.2005.08.011
- 35 Nigg JT. Is ADHD a disinhibitory disorder? *Psychol Bull* 2001;**127**:571–98. doi:10.1037/0033-2909.127.5.571

- 36 Hughes JR, Callas PW, Priest JS, *et al.* Development of a Self-Report Measure of Reward Sensitivity: A Test in Current and Former Smokers. *Nicotine Tob Res* 2017;**19**:723–8. doi:10.1093/ntr/ntw272
- 37 Watson R, McCabe C, Harvey K, *et al.* Development and validation of a new adolescent self-report scale to measure loss of interest and pleasure: The Anhedonia Scale for Adolescents. *Psychol Assess* 2021;**33**:201–17. doi:10.1037/pas0000977
- 38 Berridge KC, Robinson TE. Liking, wanting, and the incentive-sensitization theory of addiction. *Am Psychol* 2016;**71**:670–9. doi:10.1037/amp0000059
- 39 File D, Böthe B, File B, *et al.* The Role of Impulsivity and Reward Deficiency in “Liking” and “Wanting” of Potentially Problematic Behaviors and Substance Uses. *Front Psychiatry* 2022;**13**. doi:10.3389/fpsyt.2022.820836
- 40 Vainik U, Eun Han J, Epel ES, *et al.* Rapid Assessment of Reward-Related Eating: The RED-X5. *Obesity* 2019;**27**:325–31. doi:10.1002/oby.22374
- 41 Llerena K, Park SG, McCarthy JM, *et al.* The Motivation and Pleasure Scale–Self-Report (MAP-SR): Reliability and validity of a self-report measure of negative symptoms. *Compr Psychiatry* 2013;**54**:568–74. doi:10.1016/j.comppsy.2012.12.001
- 42 Rizvi SJ, Quilty LC, Sproule BA, *et al.* Development and validation of the Dimensional Anhedonia Rating Scale (DARS) in a community sample and individuals with major depression. *Psychiatry Res* 2015;**229**:109–19. doi:10.1016/j.psychres.2015.07.062
- 43 Whiteside SP, Lynam DR. The Five Factor Model and impulsivity: using a structural model of personality to understand impulsivity. *Pers Individ Dif* 2001;**30**:669–89. doi:10.1016/S0191-8869(00)00064-7
- 44 Whiteside SP, Lynam DR, Miller JD, *et al.* Validation of the UPPS impulsive behaviour scale: a four-factor model of impulsivity. *Eur J Pers* 2005;**19**:559–74. doi:10.1002/per.556
- 45 Lopez R, Dauvilliers Y, Jaussent I, *et al.* A multidimensional approach of impulsivity in adult

- attention deficit hyperactivity disorder. *Psychiatry Res* 2015;**227**:290–5.  
doi:10.1016/j.psychres.2015.03.023
- 46 Miller DJ, Derefinko KJ, Lynam DR, *et al.* Impulsivity and Attention Deficit-Hyperactivity Disorder: Subtype Classification Using the UPPS Impulsive Behavior Scale. *J Psychopathol Behav Assess* 2010;**32**:323–32. doi:10.1007/s10862-009-9155-z
- 47 Chapman LJ, Chapman JP, Raulin ML. Scales for physical and social anhedonia. *J Abnorm Psychol* 1976;**85**:374–82. doi:10.1037/0021-843X.85.4.374
- 48 Fawcett J, Clark DC, Scheftner WA, *et al.* Assessing anhedonia in psychiatric patients. *Arch Gen Psychiatry* 1983;**40**:79–84. doi:10.1001/archpsyc.1983.01790010081010
- 49 Snaith RP, Hamilton M, Morley S, *et al.* A Scale for the Assessment of Hedonic Tone the Snaith–Hamilton Pleasure Scale. *Br J Psychiatry* 1995;**167**:99–103. doi:10.1192/bjp.167.1.99
- 50 Meinzer MC, Pettit JW, Leventhal AM, *et al.* Explaining the covariance between attention-deficit hyperactivity disorder symptoms and depressive symptoms: the role of hedonic responsivity. *J Clin Psychol* 2012;**68**:1111–21. doi:10.1002/jclp.21884
- 51 Jonker NC, Timmerman ME, de Jong PJ. The reward and punishment responsivity and motivation questionnaire (RPRM-Q): A stimulus-independent self-report measure of reward and punishment sensitivity that differentiates between responsivity and motivation. *Front Psychol* 2022;**13**:929255. doi:10.3389/fpsyg.2022.929255
- 52 Bond FW, Hayes SC, Baer RA, *et al.* Preliminary psychometric properties of the Acceptance and Action Questionnaire-II: a revised measure of psychological inflexibility and experiential avoidance. *Behav Ther* 2011;**42**:676–88. doi:10.1016/j.beth.2011.03.007
- 53 Bodalski EA, Abu-Ramadan TM, Hough CE, *et al.* Low standards yet disappointed: ADHD symptoms and experiential avoidance in college students. *Journal of Contextual Behavioral Science* 2023;**28**:180–4. doi:10.1016/j.jcbs.2023.04.002
- 54 Nichols SR, Briggs-Gowan MJ, Estabrook R, *et al.* Punishment Insensitivity in Early Childhood: A

- Developmental, Dimensional Approach. *J Abnorm Child Psychol* 2015;**43**:1011–23.  
doi:10.1007/s10802-014-9950-1
- 55 Wakschlag LS, Briggs-Gowan MJ, Choi SW, *et al.* Advancing a multidimensional, developmental spectrum approach to preschool disruptive behavior. *J Am Acad Child Adolesc Psychiatry* 2014;**53**:82-96.e3. doi:10.1016/j.jaac.2013.10.011
- 56 Arksey H, O'Malley L. Scoping studies: towards a methodological framework. *Int J Soc Res Methodol* 2005;**8**:19–32. doi:10.1080/1364557032000119616
- 57 Peters MDJ, Godfrey C, McInerney P, *et al.* Best practice guidance and reporting items for the development of scoping review protocols. *JBIEvid Synth* 2022;**20**:953–68. doi:10.11124/JBIES-21-00242
- 58 Tricco AC, Lillie E, Zarin W, *et al.* PRISMA Extension for Scoping Reviews (PRISMA-ScR): Checklist and Explanation. *Ann Intern Med* 2018;**169**:467–73. doi:10.7326/M18-0850
- 59 Better systematic review management. Covidence. 2020.<https://www.covidence.org/> (accessed 10 May 2023).
- 60 Aromataris E MZ (editors). *JBIManual for Evidence Synthesis*. 2020. doi:10.46658/JBIMES-20-01
- 61 Lansdown G, Vaghri Z. Article 1: Definition of a Child. In: Vaghri Z, Zermatten J, Lansdown G, *et al.*, eds. *Monitoring State Compliance with the UN Convention on the Rights of the Child: An Analysis of Attributes*. Cham: : Springer International Publishing 2022. 407–12. doi:10.1007/978-3-030-84647-3\_40
